# Supplementary material for: Co-Sputtering Crystal Lattice Selection for Rare Earth Metal-Based Multi Cation and Mixed Anion Photochromic Films
Source: MDPI journal article supplement (doi:10.3390/nano13040684), 2023-02-09
Supplement: s1 [file s1]

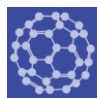

## Supplementary Materials

# Co-Sputtering Crystal Lattice Selection for Rare Earth Metal-Based Multi Cation and Mixed Anion Photochromic Films

Ming Li <sup>1,2</sup>, Zewei Shao <sup>3</sup>, Zhongshao Li <sup>1</sup>, Dandan Zhu <sup>1,2</sup>, Junwei Wang <sup>4</sup>, Smagul Zh. Karazhanov <sup>5</sup>, Ping Jin <sup>1</sup> and Xun Cao <sup>1,2,\*</sup>

<sup>1</sup> State Key Laboratory of High Performance Ceramics and Superfine Microstructure, Shanghai Institute of Ceramics, Chinese Academy of Sciences, Shanghai 200050, China

<sup>2</sup> Center of Materials Science and Optoelectronics Engineering, University of Chinese Academy of Sciences, Beijing 100049, China

<sup>3</sup> Hangzhou Global Scientific and Technological Innovation Center, Zhejiang University, Hangzhou 311215, China

<sup>4</sup> Innovation Cooperation Center (Bangkok), Chinese Academy of Sciences, Shanghai 20040, China

<sup>5</sup> Department for Solar Energy Materials and Technologies, Institute for Energy Technology, 2027 Kjeller, Norway

\* Correspondence: cxun@mail.sic.ac.cn

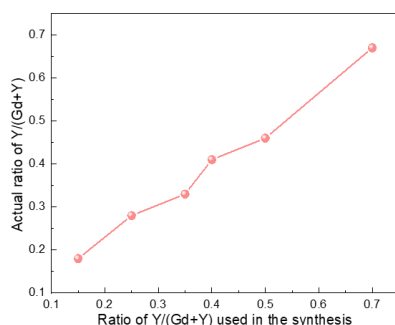

**Figure S1.** The actual ratio of Y/(Gd+Y) as determined by XPS versus the ratio of Y/(Gd+Y) used in the synthesis.

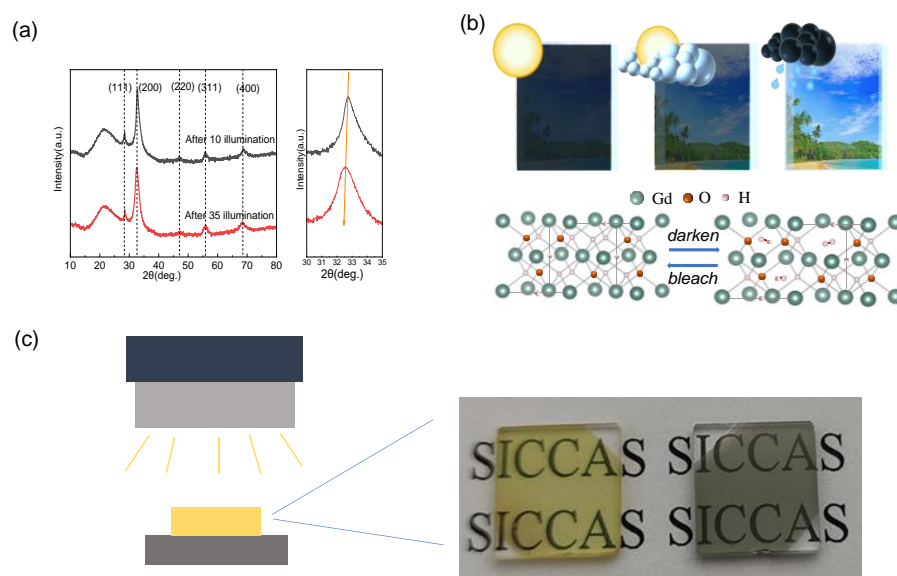

**Figure S2.** (a) The X-ray diffraction patterns of GdO<sub>x</sub>H<sub>y</sub> films exposed to 10 and 35 times of light. (b) Schematic diagram of the photochromic mechanism. (c) Sample photos before and after illumination [1, 2].

It is clear from the displacement of the characteristic peaks that the expansion of the lattice occurs with increasing light exposure, which may be due to the entry of oxygen.

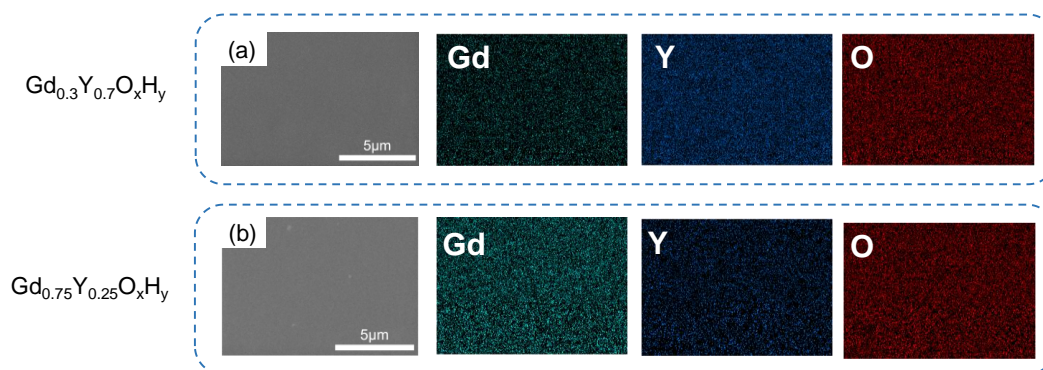

**Figure S3.** The EDS elemental mapping images of the surfaces of (a) Gd<sub>0.3</sub>Y<sub>0.7</sub>O<sub>x</sub>H<sub>y</sub> and (b) Gd<sub>0.75</sub>Y<sub>0.25</sub>O<sub>x</sub>H<sub>y</sub> films shows a uniform distribution of the elements on the surface of the films, indicating that a homogeneous phase is formed during the co-sputtering process, rather than a mixture of two substances.

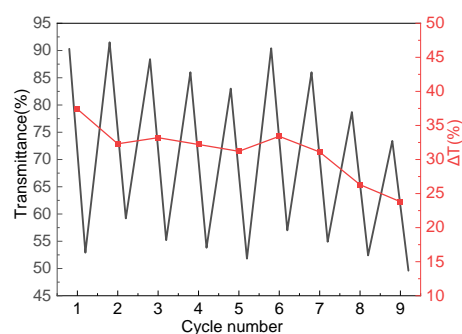

**Figure S4.** The maximum optical contrast and the change in transmittance of the corresponding wavelength after 9 cycles of Gd<sub>0.75</sub>Y<sub>0.25</sub>O<sub>x</sub>H<sub>y</sub> films. The cycling process was 30 min of light and 30 min of heating at 50°C. It has been previously shown that heating provides energy to help the recovery of the samples[3].

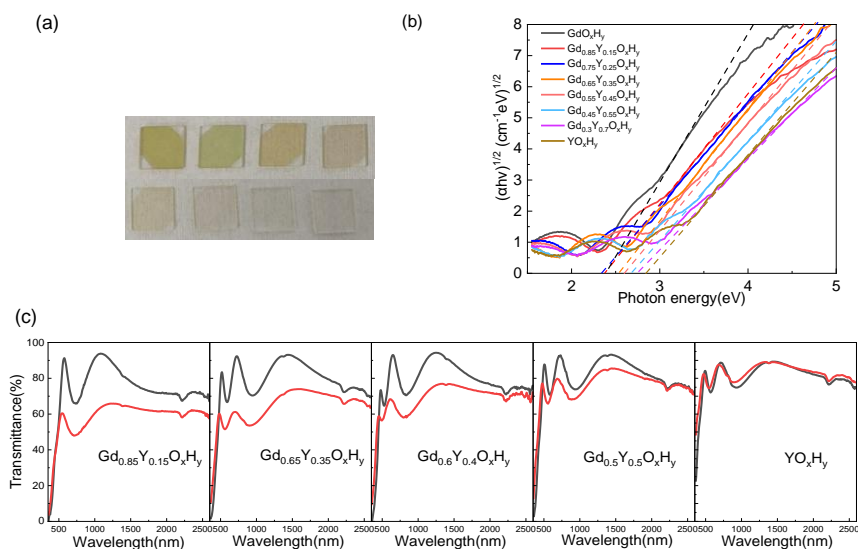

**Figure S5.** (a) The sample pictures, (b) Tauc-plots, and (c) transmittance spectra of Y and Gd films with different ratios.

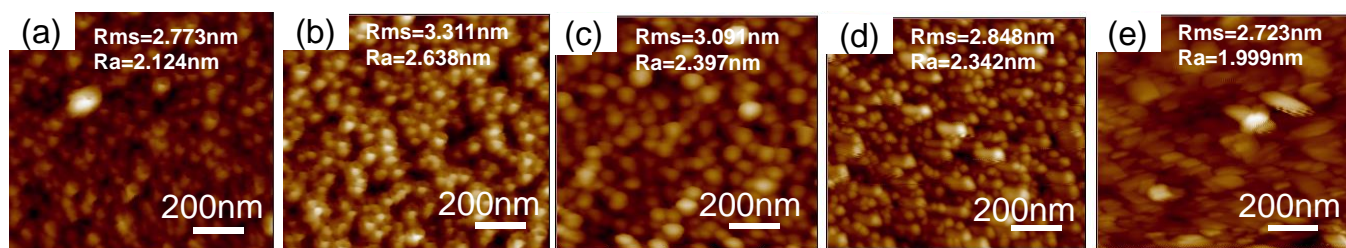

**Figure S6.** The AFM images of (a)  $GdO_xH_y$ , (b)  $Gd_{0.75}Y_{0.25}O_xH_y$ , (c)  $Gd_{0.3}Y_{0.7}O_xH_y$ , (d)  $Gd_{0.8}Ti_{0.2}O_xH_y$ , and (e)  $Gd_{0.8}Cr_{0.2}O_xH_y$  films.

The co-sputtering process inevitably leads to an increase in surface roughness. However, the surface roughness decreases gradually with the decrease of the lattice constant.

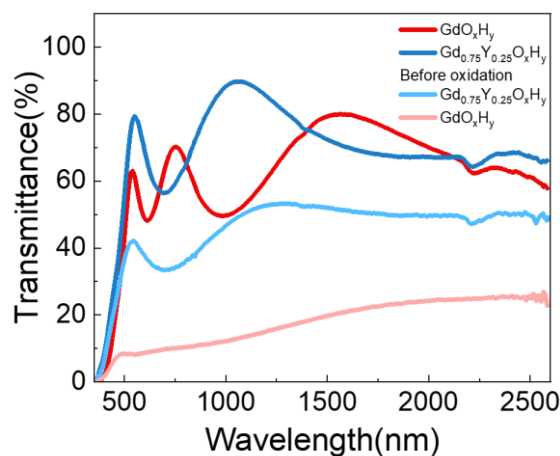

**Figure S7.** The transmittance spectra of  $GdO_xH_y$  and  $Gd_{0.75}Y_{0.25}O_xH_y$  films after oxidation.

## References

1. Chai, J.; Shao, Z.; Wang, H.; Ming, C.; Oh, W.; Ye, T.; Zhang, Y.; Cao, X.; Jin, P.; Zhang, S.; et al. Ultrafast processes in photochromic material YHxOy studied by excited-state density functional theory simulation. *Sci. China Mater.* **2020**, *63*, 1579–1587. <https://doi.org/10.1007/s40843-020-134>.
2. Chandran, C.V.; Schreuders, H.; Dam, B.; Janssen, J.W.G.; Bart, J.; Kentgens, A.P.M.; van Bentum, P.J.M. Solid-State NMR Studies of the Photochromic Effects of Thin Films of Oxygen-Containing Yttrium Hydride. *J. Phys. Chem. C* **2014**, *118*, 22935–22942. <https://doi.org/10.1021/jp507248c>.
3. Zhang, Q.; Xie, L.; Zhu, Y.; Tao, Y.; Li, R.; Xu, J.; Bao S.; Jin P. Photo-thermochromic properties of oxygen-containing yttrium hydride and tungsten oxide composite films. *Sol. Energy Mater. Sol. Cells.* **2019**, *200*, 109930. doi:10.1016/j.solmat.2019.109930.
